# Supplementary material for: A Comprehensive Molecular and Clinical Analysis of the piRNA Pathway Genes in Ovarian Cancer
Source: MDPI journal article supplement (doi:10.3390/cancers13010004), 2020-12-22
Supplement: s1 [file s1]

1 2 3 4 5 6 7 8 9

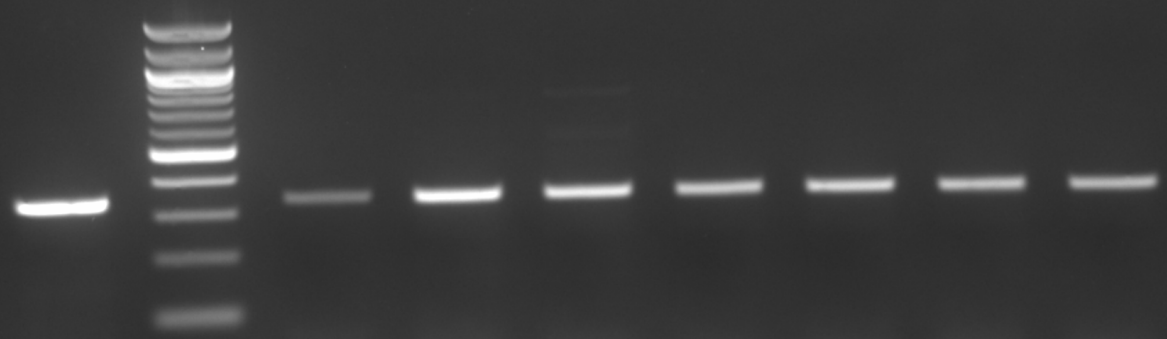

Not included in manuscript

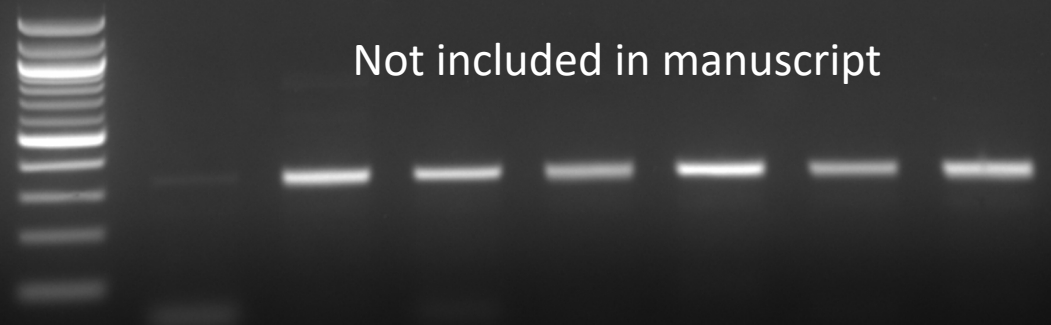

Figure 4. *PIWIL2* expression  
Lanes:  
1: Positive control (not included in manuscript image)  
2: 100bp ladder  
3: Untreated  
4: 50 FSH  
5: 100 FSH  
6: 25 LH  
7: 50 LH  
8: 25 LH + 50 FSH  
9: 50 LH + 100 FSH

1 2 3 4 5 6 7 8 9

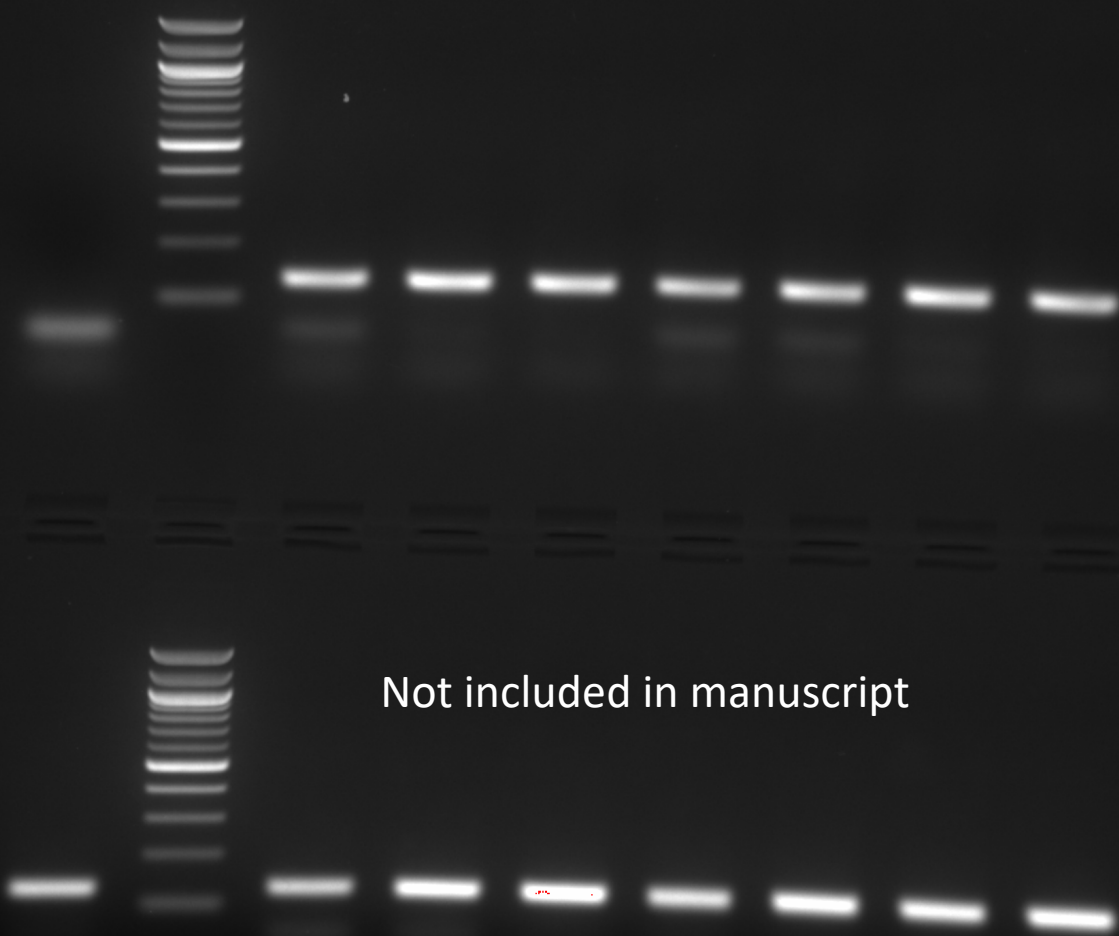

Not included in manuscript

Figure 4.  $\beta$ -actin expression

Lanes:

1: Negative control (not included in manuscript image)

2: 100bp ladder

3: Untreated

4: 50 FSH

5: 100 FSH

6: 25 LH

7: 50 LH

8: 25 LH + 50 FSH

9: 50 LH + 100 FSH
